# Supplementary material for: Mapping causal mutations by exome sequencing in a wheat TILLING population: a tall mutant case study
Source: PubMed Central journal article supplement (PMC5854723; doi:10.1007/s00438-017-1401-6), 2017-11-29
Supplement: 438_2017_1401_MOESM1_ESM.pdf [file 438_2017_1401_MOESM1_ESM.pdf]

## **Online Resources**

### **Mapping causal mutations by exome sequencing in a wheat TILLING population: a tall mutant case study**

Molecular Genetics and Genomics

Youngjun Mo, Tyson Howell, Hans Vasquez-Gross, Luis Alejandro de Haro, Jorge Dubcovsky,  
Stephen Pearce

#### **Corresponding author:**

Stephen Pearce, Department of Soil and Crop Sciences, Colorado State University, Fort Collins,  
Colorado, United States of America

[stephen.pearce@colostate.edu](mailto:stephen.pearce@colostate.edu)

**Fig. S1** *Rht-B1* amplification from the 48 M<sub>4</sub> mapping individuals. PCR was conducted using primers amplifying 929 bp to 2397 bp region of *Rht-B1* [21]. Target bands in the gel picture are indicated with grey triangles. Blue and red colors indicate the 24 shortest and 24 tallest M<sub>4</sub> lines, respectively. C, T, and H indicate homozygous C SNP, homozygous T SNP, and heterozygous CT genotypes, respectively, for the peak SNP (C3986T on IWGSC\_CSS\_4BS\_scaffold\_4881784; see Table 1 and Online Resource Table S2).

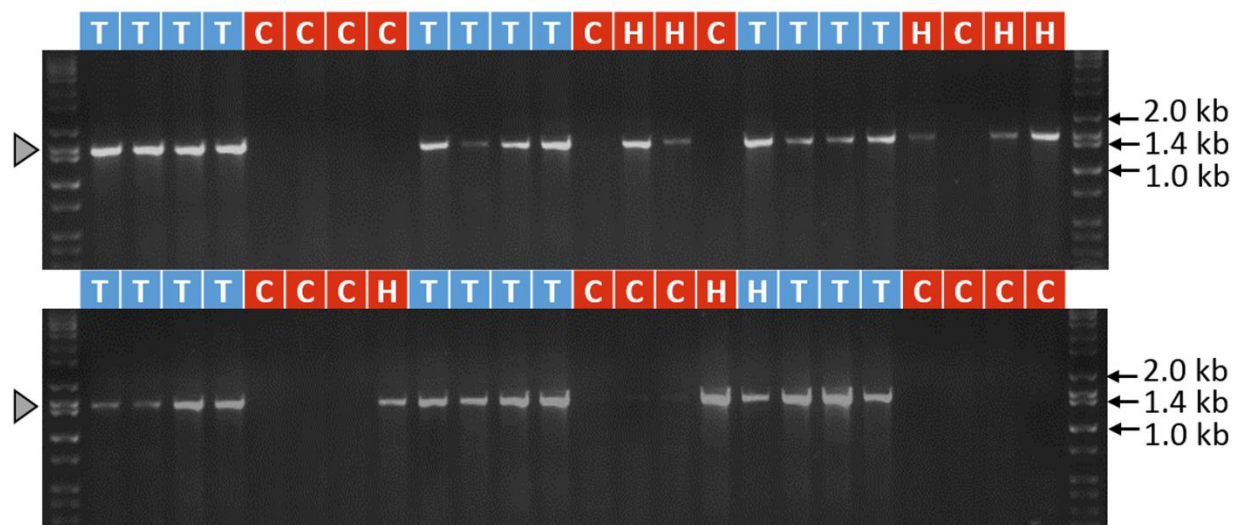

**Fig. S2** Coverage analysis of genes residing in the deletion identified in T4-3822 and its flanking region. Nine genes in the deleted region (Table 2) and three flanking genes at either side of the deletion analyzed in detail from the coverage plot in Fig. 4a. For each gene, full coding region and 200 bp of 5' and 3' flanking sequences (according to the IWGSC RefSeq v1.0 annotation) were selected. Gene IDs and their locations on chromosome 4B are highlighted in bold to indicate their deletion in tall M<sub>4</sub> sister lines. Blue, purple, and red colors in coverage plots indicate M<sub>4</sub> individuals homozygous (CC), heterozygous (CT), and homozygous (TT) for the peak SNP (C3986T on IWGSC\_CSS\_4BS\_scaff\_4881784), respectively (Online Resource Table S2). X-axis: position on chromosome 4B (bp); Y-axis: normalized read depth.

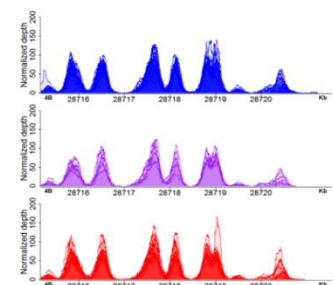

TraesCS4B01G042000 (28.72 Mb)

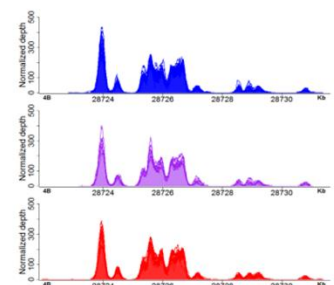

TraesCS4B01G042100 (28.72 Mb)

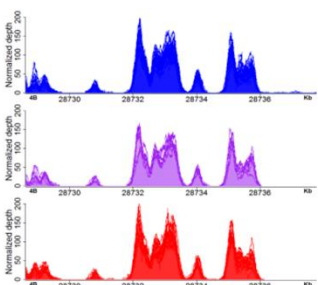

TraesCS4B01G042200 (28.73 Mb)

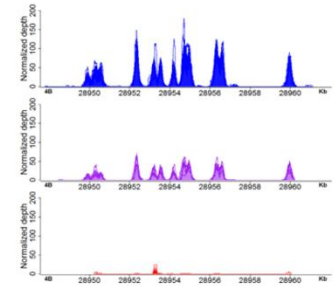

TraesCS4B01G042300 (28.95 Mb)

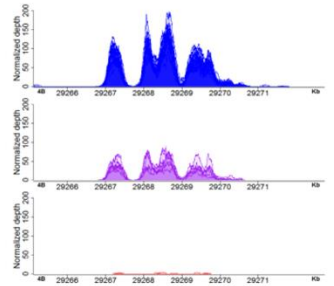

TraesCS4B01G042400 (29.27 Mb)

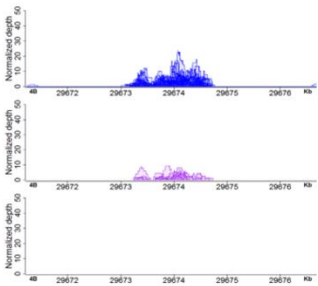

TraesCS4B01G042500 (29.67 Mb)

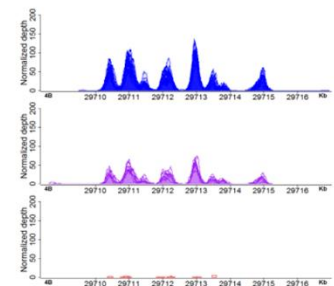

TraesCS4B01G042600 (29.71 Mb)

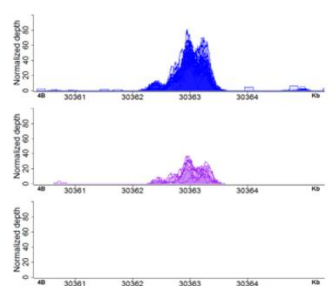

TraesCS4B01G042700 (30.36 Mb)

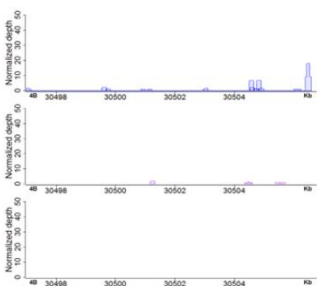

TraesCS4B01G042800 (30.50 Mb)

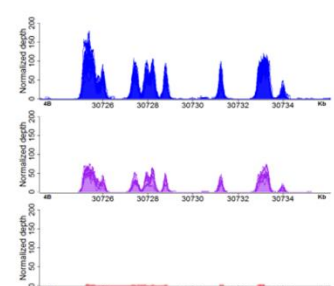

TraesCS4B01G042900 (30.73 Mb)

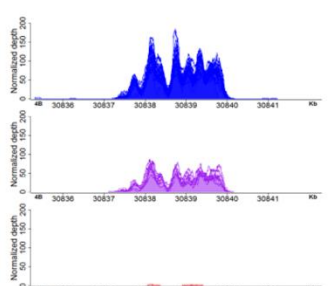

TraesCS4B01G043000 (30.84 Mb)

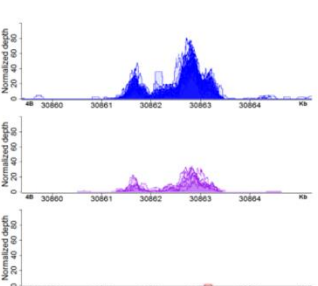

TraesCS4B01G043100 (30.86 Mb)

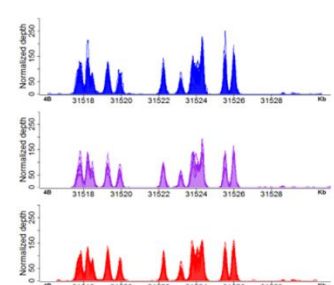

TraesCS4B01G043200 (31.52 Mb)

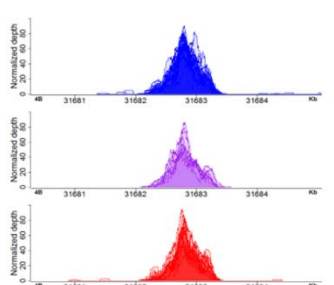

TraesCS4B01G043300 (31.68 Mb)

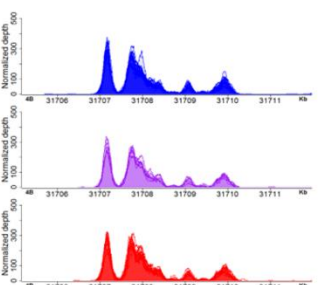

TraesCS4B01G043400 (31.71 Mb)

**Fig. S3** Bulk size simulation. BSA rank (A) and  $|\Delta(\text{SNP-index})|$  (B) of the three most significant SNPs (Table 1) at different bulk sizes. BSA rank was determined by the  $|\Delta(\text{SNP-index})|$  values using modified competition ranking (whereby tied SNPs share the lowest rank).

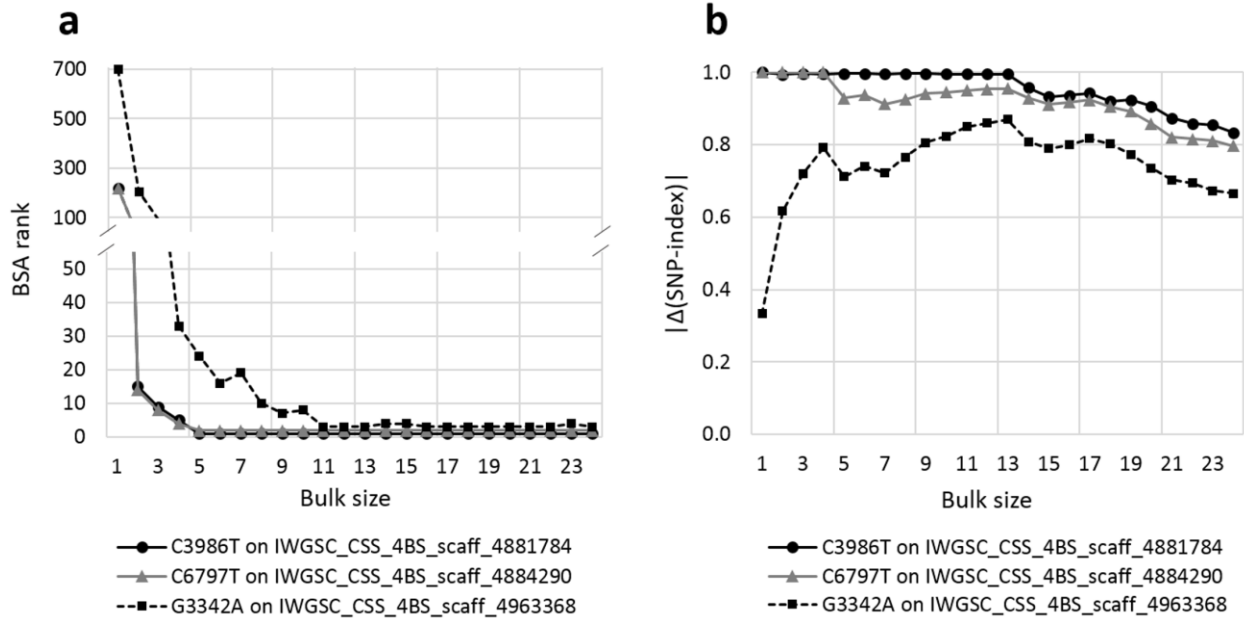

**Fig. S4** BSA simulation with different bulk sizes and sequencing depths. (A) BSA simulation under six different sequencing depths when  $n = 24$  (the 24 shortest and 24 tallest lines for each bulk). (B) BSA simulation under six different sequencing depths when  $n = 12$  (the 12 shortest and 12 tallest lines for each bulk).



**Fig S5** Effect of the *Rht-B1* W424\* mutation on plant height in an M<sub>4</sub> population (n = 16) derived from TILLING line T4-3545. M<sub>4</sub> seeds bulk-harvested from an M<sub>3</sub> row were used to evaluate plant height under greenhouse condition.

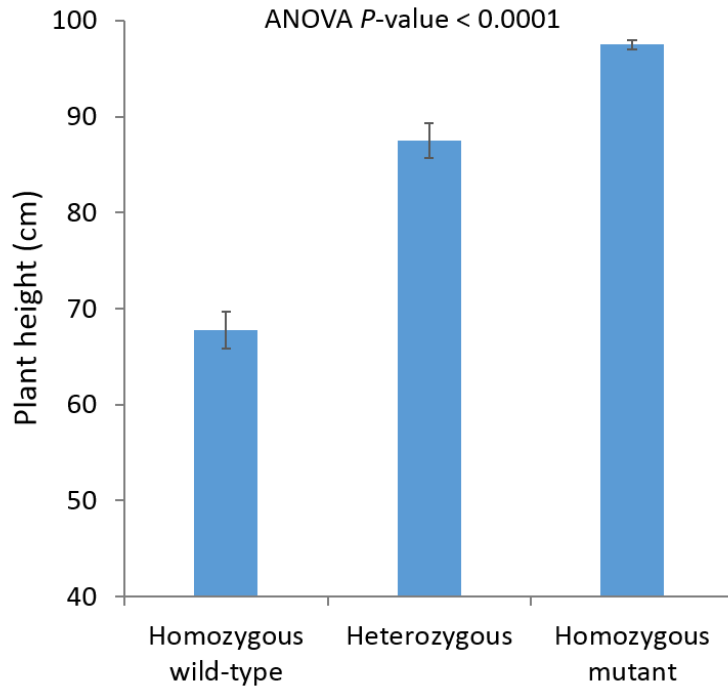



**Fig S6** GA sensitivity assay. Coleoptile length (A) and shoot length (B) of 10-day old seedlings of wild-type Kronos (*Rht-B1b*, GA-insensitive), Gredho (*Rht-B1a*, GA-sensitive) and an M<sub>5</sub> line of T4-3822 homozygous for the deletion on chromosome 4BS treated with different concentrations of GA<sub>3</sub>. *P* values are from one-way ANOVAs with four GA levels within each genotype. An asterisk indicates significant difference compared to the mock treatment within each genotype by Dunnett's test (*P* < 0.05).

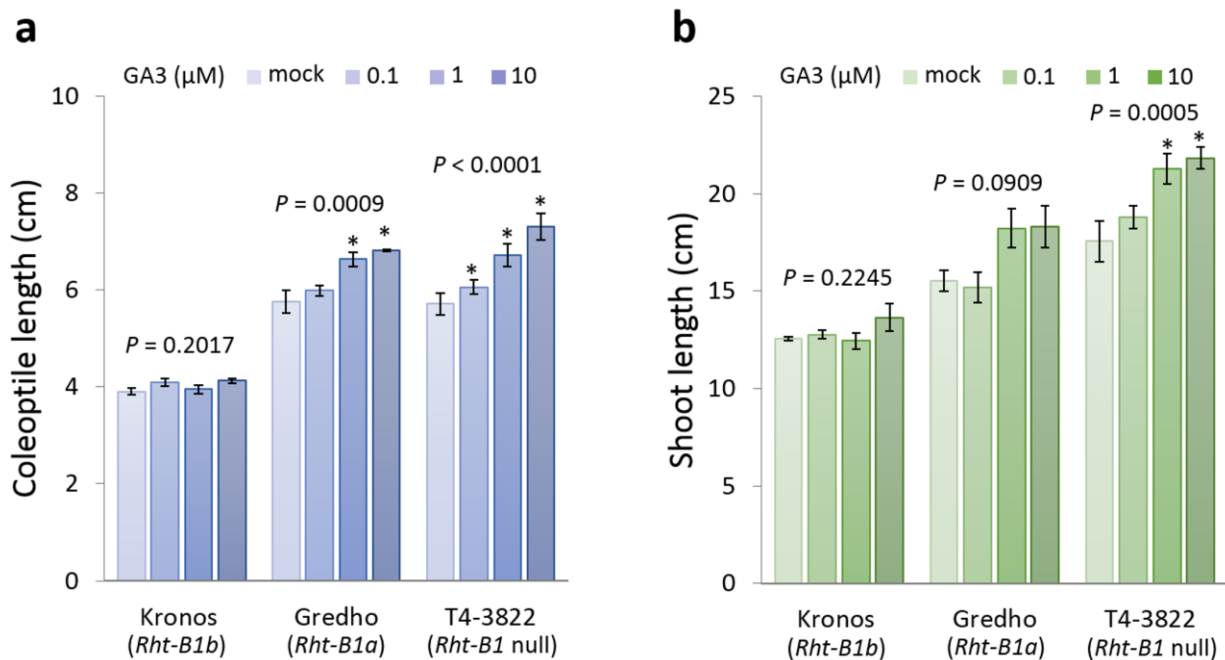

**Table S1** Exome sequencing data summary of the 48 M<sub>4</sub> mapping individuals.

| Plant    | Number of raw reads | Number of trimmed reads | Number of mapped reads | Percentage of reads mapped | Number of uniquely mapped reads (quality >20) | Percentage of reads uniquely mapped (quality >20) |
|----------|---------------------|-------------------------|------------------------|----------------------------|-----------------------------------------------|---------------------------------------------------|
| Plant 01 | 32,850,160          | 32,656,660              | 31,889,527             | 97.7                       | 28,543,689                                    | 87.4                                              |
| Plant 02 | 57,354,648          | 56,955,498              | 55,610,777             | 97.6                       | 49,817,194                                    | 87.5                                              |
| Plant 03 | 24,968,448          | 24,821,016              | 24,228,738             | 97.6                       | 21,675,040                                    | 87.3                                              |
| Plant 04 | 52,905,554          | 52,578,904              | 51,308,462             | 97.6                       | 45,900,805                                    | 87.3                                              |
| Plant 05 | 14,951,350          | 14,870,598              | 14,101,901             | 94.8                       | 11,554,433                                    | 77.7                                              |
| Plant 06 | 58,409,068          | 58,056,552              | 56,641,621             | 97.6                       | 50,638,645                                    | 87.2                                              |
| Plant 07 | 56,083,916          | 55,741,116              | 54,390,360             | 97.6                       | 48,699,610                                    | 87.4                                              |
| Plant 08 | 60,085,722          | 59,695,162              | 58,294,619             | 97.7                       | 52,250,663                                    | 87.5                                              |
| Plant 09 | 45,111,640          | 44,872,426              | 43,472,552             | 96.9                       | 38,469,572                                    | 85.7                                              |
| Plant 10 | 62,499,738          | 62,126,602              | 60,243,400             | 97.0                       | 53,465,983                                    | 86.1                                              |
| Plant 11 | 63,100,394          | 62,699,330              | 60,838,936             | 97.0                       | 54,045,838                                    | 86.2                                              |
| Plant 12 | 57,041,284          | 56,694,350              | 55,019,134             | 97.0                       | 48,866,367                                    | 86.2                                              |
| Plant 13 | 27,096,672          | 26,939,332              | 26,149,840             | 97.1                       | 23,236,418                                    | 86.3                                              |
| Plant 14 | 75,106,796          | 74,641,980              | 72,245,992             | 96.8                       | 64,057,268                                    | 85.8                                              |
| Plant 15 | 30,418,658          | 30,222,266              | 29,369,964             | 97.2                       | 26,148,457                                    | 86.5                                              |
| Plant 16 | 21,579,282          | 21,428,248              | 20,816,903             | 97.1                       | 18,501,818                                    | 86.3                                              |
| Plant 17 | 46,766,842          | 46,348,364              | 45,177,329             | 97.5                       | 40,383,560                                    | 87.1                                              |
| Plant 18 | 39,648,674          | 39,306,890              | 38,240,225             | 97.3                       | 34,050,732                                    | 86.6                                              |
| Plant 19 | 38,133,756          | 37,778,292              | 36,711,100             | 97.2                       | 32,617,102                                    | 86.3                                              |
| Plant 20 | 40,843,828          | 40,509,524              | 39,460,170             | 97.4                       | 35,224,368                                    | 87.0                                              |
| Plant 21 | 56,528,836          | 56,000,856              | 54,504,488             | 97.3                       | 48,652,086                                    | 86.9                                              |
| Plant 22 | 36,166,678          | 35,869,682              | 34,885,931             | 97.3                       | 31,077,320                                    | 86.6                                              |
| Plant 23 | 43,060,118          | 42,665,994              | 41,568,737             | 97.4                       | 37,145,146                                    | 87.1                                              |
| Plant 24 | 37,941,910          | 37,611,210              | 36,659,767             | 97.5                       | 32,764,926                                    | 87.1                                              |
| Plant 25 | 45,510,206          | 45,130,224              | 43,463,138             | 96.3                       | 37,710,136                                    | 83.6                                              |
| Plant 26 | 53,124,840          | 52,667,874              | 50,645,326             | 96.2                       | 43,833,498                                    | 83.2                                              |
| Plant 27 | 19,769,548          | 19,606,654              | 18,875,556             | 96.3                       | 16,354,706                                    | 83.4                                              |
| Plant 28 | 53,371,552          | 52,947,652              | 50,918,774             | 96.2                       | 44,100,033                                    | 83.3                                              |
| Plant 29 | 49,197,668          | 48,759,356              | 46,966,862             | 96.3                       | 40,779,173                                    | 83.6                                              |
| Plant 30 | 49,016,796          | 48,568,738              | 46,754,828             | 96.3                       | 40,523,856                                    | 83.4                                              |
| Plant 31 | 50,701,356          | 50,251,738              | 48,437,283             | 96.4                       | 42,079,540                                    | 83.7                                              |
| Plant 32 | 46,964,250          | 46,524,290              | 44,878,631             | 96.5                       | 39,003,478                                    | 83.8                                              |
| Plant 33 | 56,083,868          | 54,988,438              | 53,455,791             | 97.2                       | 47,525,437                                    | 86.4                                              |
| Plant 34 | 75,316,226          | 73,720,298              | 71,788,542             | 97.4                       | 63,998,365                                    | 86.8                                              |
| Plant 35 | 62,141,290          | 60,867,158              | 59,184,498             | 97.2                       | 52,630,540                                    | 86.5                                              |
| Plant 36 | 7,356,736           | 7,209,608               | 7,017,934              | 97.3                       | 6,256,537                                     | 86.8                                              |
| Plant 37 | 32,034,446          | 31,347,440              | 30,527,634             | 97.4                       | 27,229,153                                    | 86.9                                              |
| Plant 38 | 32,041,662          | 31,223,544              | 30,442,254             | 97.5                       | 27,217,817                                    | 87.2                                              |
| Plant 39 | 27,315,966          | 26,748,922              | 26,036,465             | 97.3                       | 23,213,213                                    | 86.8                                              |
| Plant 40 | 26,268,936          | 25,769,662              | 25,086,615             | 97.3                       | 22,341,293                                    | 86.7                                              |
| Plant 41 | 35,713,538          | 34,797,262              | 33,877,005             | 97.4                       | 30,140,368                                    | 86.6                                              |
| Plant 42 | 54,355,402          | 52,896,440              | 51,312,020             | 97.0                       | 45,320,264                                    | 85.7                                              |
| Plant 43 | 83,540,556          | 81,708,360              | 79,392,869             | 97.2                       | 70,590,589                                    | 86.4                                              |
| Plant 44 | 13,091,930          | 12,809,478              | 12,451,996             | 97.2                       | 11,077,172                                    | 86.5                                              |
| Plant 45 | 41,590,416          | 40,584,256              | 39,481,050             | 97.3                       | 35,193,279                                    | 86.7                                              |
| Plant 46 | 29,909,708          | 29,247,960              | 28,469,166             | 97.3                       | 25,389,333                                    | 86.8                                              |

|                |                   |                   |                   |             |                   |             |
|----------------|-------------------|-------------------|-------------------|-------------|-------------------|-------------|
| Plant 47       | 34,775,974        | 34,036,868        | 33,138,148        | 97.4        | 29,554,630        | 86.8        |
| Plant 48       | 34,133,626        | 33,350,068        | 32,479,190        | 97.4        | 29,006,641        | 87.0        |
| <b>Average</b> | <b>43,582,926</b> | <b>43,059,440</b> | <b>41,810,668</b> | <b>97.1</b> | <b>37,059,502</b> | <b>86.1</b> |

---

**Table S2** Plant height and genotype data of the significant SNPs (Bonferroni  $P < 0.05$ ) on chromosome 4BS of the 48 M<sub>4</sub> mapping individuals.

|                             | IWGSC_CSS_4BS_scaff_ | 4920499 | 4933555 | 1070968 | 4872575 | 4909391 | 4961119 | 4963368 | 4884290 | 4881784   | 4911525 | 2307753 | 4868930 | 4904809 | 4935065 |
|-----------------------------|----------------------|---------|---------|---------|---------|---------|---------|---------|---------|-----------|---------|---------|---------|---------|---------|
|                             | SNP position         | 9117    | 4037    | 1979    | 19299   | 8166    | 20843   | 3342    | 6797    | 3986      | 11750   | 3238    | 6350    | 9422    | 7502    |
|                             | Wile-type allele     | G       | G       | C       | C       | A       | G       | G       | C       | C         | C       | C       | C       | G       | C       |
| Height<br>(cm) <sup>a</sup> | Mutant allele        | A       | A       | T       | T       | G       | A       | A       | T       | T         | T       | T       | T       | A       | T       |
|                             | P-value              | 5.8E-06 | 8.8E-07 | 8.8E-07 | 7.4E-07 | 3.6E-06 | 1.7E-06 | 1.6E-11 | 1.1E-14 | < 2.0E-16 | 4.8E-06 | 2.4E-06 | 2.7E-07 | 3.3E-05 | 1.1E-05 |
| 70                          | Plant 02             | AA      | GG      | CC      | CC      | AA      | AA      | GG      | TT      | TT        | TT      | CC      | CC      | GG      | CC      |
| 71                          | Plant 28             | AA      | GG      | CC      | CC      | AA      | AA      | GG      | TT      | TT        | TT      | CC      | CC      | GG      | CC      |
| 74                          | Plant 33             | AA      | GG      | CC      | CC      | AA      | AA      | GG      | TT      | TT        | TT      | CC      | CC      | HET     | HET     |
| 76                          | Plant 44             | AA      | GG      | CC      | CC      | AA      | AA      | GG      | TT      | TT        | .       | .       | CC      | HET     | HET     |
| 79                          | Plant 25             | AA      | GG      | CC      | CC      | AA      | AA      | GG      | TT      | TT        | CC      | TT      | TT      | AA      | TT      |
| 80                          | Plant 19             | AA      | GG      | CC      | CC      | AA      | AA      | GG      | TT      | TT        | TT      | CC      | CC      | HET     | HET     |
| 80                          | Plant 36             | AA      | GG      | CC      | CC      | .       | AA      | GG      | .       | TT        | .       | .       | HET     | .       | HET     |
| 82                          | Plant 01             | AA      | GG      | CC      | CC      | AA      | AA      | GG      | TT      | TT        | HET     | .       | HET     | AA      | TT      |
| 82                          | Plant 11             | AA      | GG      | CC      | CC      | AA      | AA      | GG      | TT      | TT        | CC      | TT      | TT      | AA      | TT      |
| 82                          | Plant 20             | AA      | GG      | CC      | CC      | AA      | AA      | GG      | TT      | TT        | CC      | TT      | TT      | AA      | TT      |
| 83                          | Plant 43             | AA      | GG      | CC      | CC      | AA      | AA      | GG      | TT      | TT        | TT      | HET     | HET     | HET     | HET     |
| 83                          | Plant 35             | HET     | GG      | CC      | CC      | AA      | AA      | GG      | TT      | TT        | TT      | CC      | CC      | GG      | CC      |
| 83                          | Plant 09             | AA      | GG      | CC      | CC      | AA      | AA      | GG      | TT      | TT        | TT      | CC      | CC      | HET     | HET     |
| 84                          | Plant 03             | AA      | GG      | CC      | CC      | AA      | AA      | GG      | TT      | TT        | TT      | CC      | CC      | HET     | HET     |
| 84                          | Plant 41             | AA      | GG      | CC      | CC      | AA      | AA      | GG      | TT      | TT        | .       | TT      | TT      | AA      | TT      |
| 84                          | Plant 10             | AA      | GG      | CC      | CC      | AA      | AA      | GG      | TT      | TT        | TT      | CC      | CC      | GG      | CC      |
| 84                          | Plant 04             | AA      | GG      | CC      | CC      | AA      | AA      | GG      | TT      | TT        | HET     | HET     | HET     | HET     | HET     |
| 84                          | Plant 27             | HET     | HET     | HET     | HET     | HET     | HET     | HET     | HET     | HET       | HET     | HET     | HET     | HET     | HET     |
| 85                          | Plant 17             | AA      | GG      | CC      | CC      | AA      | AA      | GG      | TT      | TT        | TT      | CC      | CC      | GG      | CC      |
| 85                          | Plant 18             | AA      | GG      | CC      | CC      | AA      | AA      | HET     | HET     | TT        | TT      | CC      | CC      | GG      | CC      |
| 85                          | Plant 42             | AA      | GG      | CC      | CC      | AA      | AA      | GG      | TT      | TT        | CC      | TT      | TT      | AA      | TT      |
| 85                          | Plant 26             | AA      | GG      | CC      | CC      | AA      | AA      | GG      | TT      | TT        | TT      | CC      | CC      | GG      | CC      |
| 86                          | Plant 12             | AA      | GG      | CC      | CC      | AA      | AA      | GG      | TT      | TT        | TT      | CC      | CC      | HET     | HET     |
| 86                          | Plant 34             | AA      | GG      | CC      | CC      | AA      | AA      | GG      | TT      | TT        | .       | HET     | HET     | HET     | HET     |
| 109                         | Plant 21             | AA      | GG      | CC      | CC      | AA      | AA      | HET     | HET     | HET       | HET     | HET     | HET     | HET     | HET     |
| 109                         | Plant 40             | AA      | GG      | CC      | CC      | AA      | AA      | GG      | TT      | HET       | .       | HET     | .       | HET     | HET     |
| 110                         | Plant 23             | HET     | HET     | HET     | HET     | HET     | HET     | HET     | HET     | HET       | HET     | HET     | HET     | AA      | TT      |
| 111                         | Plant 14             | HET     | HET     | HET     | HET     | HET     | HET     | HET     | HET     | HET       | HET     | HET     | HET     | AA      | TT      |
| 111                         | Plant 24             | HET     | HET     | HET     | HET     | .       | HET     | HET     | HET     | HET       | TT      | HET     | HET     | AA      | TT      |
| 114                         | Plant 37             | AA      | GG      | CC      | CC      | AA      | AA      | GG      | TT      | CC        | .       | TT      | TT      | AA      | TT      |

|     |          |     |     |     |     |     |    |     |     |     |     |     |    |     |     |
|-----|----------|-----|-----|-----|-----|-----|----|-----|-----|-----|-----|-----|----|-----|-----|
| 117 | Plant 15 | AA  | GG  | CC  | CC  | AA  | AA | HET | HET | HET | HET | HET | .  | HET | HET |
| 117 | Plant 08 | GG  | AA  | TT  | TT  | GG  | GG | AA  | CC  | CC  | CC  | TT  | TT | AA  | TT  |
| 118 | Plant 46 | AA  | GG  | CC  | CC  | AA  | AA | AA  | CC  | CC  | CC  | TT  | TT | AA  | TT  |
| 119 | Plant 05 | GG  | AA  | TT  | TT  | GG  | GG | .   | CC  | CC  | .   | .   | TT | .   | TT  |
| 120 | Plant 32 | HET | HET | HET | TT  | GG  | GG | AA  | CC  | CC  | CC  | TT  | TT | AA  | TT  |
| 120 | Plant 16 | HET | HET | HET | HET | .   | .  | HET | HET | HET | HET | HET | .  | AA  | TT  |
| 120 | Plant 45 | GG  | AA  | TT  | TT  | GG  | GG | AA  | CC  | CC  | CC  | TT  | TT | AA  | TT  |
| 120 | Plant 06 | GG  | AA  | TT  | TT  | GG  | GG | AA  | CC  | CC  | CC  | TT  | TT | AA  | TT  |
| 121 | Plant 22 | GG  | AA  | TT  | TT  | GG  | GG | AA  | CC  | CC  | CC  | TT  | TT | AA  | TT  |
| 121 | Plant 29 | GG  | AA  | TT  | TT  | GG  | GG | AA  | CC  | CC  | CC  | TT  | TT | AA  | TT  |
| 121 | Plant 31 | GG  | AA  | TT  | TT  | GG  | GG | AA  | CC  | CC  | CC  | TT  | TT | AA  | TT  |
| 121 | Plant 39 | AA  | GG  | CC  | CC  | AA  | AA | HET | HET | CC  | CC  | TT  | TT | AA  | TT  |
| 122 | Plant 13 | GG  | AA  | TT  | TT  | GG  | GG | AA  | CC  | CC  | CC  | TT  | TT | AA  | TT  |
| 122 | Plant 47 | AA  | GG  | CC  | CC  | AA  | AA | GG  | HET | CC  | CC  | TT  | TT | AA  | TT  |
| 123 | Plant 30 | GG  | AA  | TT  | TT  | GG  | GG | AA  | CC  | CC  | CC  | TT  | TT | AA  | TT  |
| 123 | Plant 48 | GG  | AA  | TT  | TT  | GG  | GG | AA  | CC  | CC  | CC  | TT  | TT | AA  | TT  |
| 125 | Plant 38 | AA  | GG  | CC  | CC  | AA  | AA | AA  | CC  | CC  | CC  | TT  | TT | HET | HET |
| 129 | Plant 07 | .   | HET | HET | HET | HET | .  | HET | CC  | CC  | CC  | TT  | TT | AA  | TT  |

a – Plants shaded in blue = short phenotype; plants shaded in pink = tall phenotype.

**Table S3** Primer sequences used to amplify the *Rht-B1* gene.

| <i>Rht-B1</i> region <sup>a</sup> | Primer name <sup>b</sup> | Sequence (5' to 3') <sup>b</sup> |
|-----------------------------------|--------------------------|----------------------------------|
| -1888 to -648                     | Rht-B-F4                 | CACCACCGATCTCGAACAA              |
|                                   | Rht-ABD-R10              | CATAGCTAATGCGACACACG             |
| -986 to -177                      | Rht-B-F5                 | CAATGACAAAATAATAGCCATTCTC        |
|                                   | Rht-B-R3                 | AGCGGCAGCGTAGTAGTTGT             |
| -449 to 84                        | Rht-F03                  | GAGTCTGACGCAGCAGAGAG             |
|                                   | Rht-ABD-R5               | CGACACCATCATCTTGTCCT             |
| -58 to 1047                       | Rht-B-F1                 | AGGCAAGCAAAAGCTTGAGA             |
|                                   | Rht-ABD-R6               | TGCATCCCCTGCTTGATG               |
| 925 to 2397                       | Rht-ABD-F3               | TTCTACGAGTCCTGCCCCTA             |
|                                   | Rht-B-R1                 | CGGCAAAGGAAGCTAAGTTG             |

<sup>a</sup>Position from the start codon. <sup>b</sup>Primer name and sequences are from Wilhelm et al. (2013).

**Table S4** Nonsense and splice site mutations within the nine genes located in the 28.95 – 30.86 Mb deletion on chromosome 4B identified from the *in silico* wheat TILLING database.

| Gene ID<br>(RefSeq v1.0)                | Gene ID<br>(PGSB/MIPS version<br>2.2) | Nonsense mutation |                  | Splice site mutation |              |
|-----------------------------------------|---------------------------------------|-------------------|------------------|----------------------|--------------|
|                                         |                                       | Effect            | TILLING line     | Effect               | TILLING line |
| TraesCS4B01G042300                      | Traes_4BS_940966B84                   | Q59*              | T6-1044          | C2660T (donor)       | T4-2987      |
|                                         |                                       | Q125*             | T6-1290          | C2870T (donor)       | T4-4307      |
|                                         |                                       | W221*             | T4-3224, T6-1354 | C5259T (donor)       | T6-1532      |
|                                         |                                       | W293*             | T6-0849          | C5360A (acceptor)    | T6-1553      |
|                                         |                                       | W330*             | T4-1290          |                      |              |
|                                         |                                       | Q385*             | T4-413           |                      |              |
|                                         |                                       | W427*             | T6-0281          |                      |              |
| TraesCS4B01G042400                      | Traes_4BS_00E6DD0F9                   | Q334*             | T4-413           | C1367T (donor)       | T6-1103      |
| TraesCS4B01G042500                      | Traes_4BS_3D1AEE34B                   | -                 | -                | -                    | -            |
| TraesCS4B01G042600                      | Traes_4BS_1706C4B88                   | W53*              | T4-2587, T6-0926 |                      |              |
| TraesCS4B01G042700                      | Traes_4BS_DC076554D                   | Q18*              | T6-1759          |                      |              |
|                                         |                                       | Q142*             | T4-2226          |                      |              |
|                                         |                                       | E306*             | T6-1331          |                      |              |
|                                         |                                       | W341*             | T4-562           |                      |              |
| TraesCS4B01G042800                      | -                                     | -                 | -                | -                    | -            |
| TraesCS4B01G042900                      | Traes_4BS_5D41A789A                   | W52*              | T4-199           | C5903T (acceptor)    | T4-4657      |
|                                         |                                       | W158*             | T4-2206          |                      |              |
|                                         |                                       | W186*             | T4-3233          |                      |              |
|                                         |                                       | W187*             | T6-0667          |                      |              |
|                                         |                                       | W233*             | T4-2087, T6-1553 |                      |              |
| TraesCS4B01G043000                      | Traes_4BS_668A7A78A                   | W350*             | T6-0173          | C2575T (acceptor)    | T4-2166      |
|                                         |                                       |                   |                  | C2666T (donor)       | T4-391       |
|                                         |                                       |                   |                  | C1996T (acceptor)    | T6-2092      |
| TraesCS4B01G043100<br>( <i>Rht-B1</i> ) | Traes_4BS_2EE4988CD                   | Q291*             | T6-1461          |                      |              |
|                                         |                                       | W424*             | T4-3545          |                      |              |
|                                         |                                       | W435*             | T6-1509          |                      |              |

<sup>a</sup> IWGSC RefSeq v1.0 annotation; <sup>b</sup> PGSB/MIPS version 2.2 annotation used for the sequenced TILLING database (Krasileva et al. 2017; www.wheat-tillin.com); <sup>c</sup> T4 and T6 lines derived from the tetraploid and hexaploid wheat varieties Kronos and Cadenza, respectively.

**Text S1** False positive estimation in BSA simulation

The threshold of  $|\Delta(\text{SNP-index})| \geq 0.8$  was used to estimate the number of false positives in BSA simulation with different sequencing depths and bulk sizes (Fig 5B). The probability of having  $|\Delta(\text{SNP-index})| \geq 0.8$  at an unlinked SNP is 0.001% at sequencing depth  $n = 10$ , which is calculated using the following rationale.

**Expected  $|\Delta\text{SNP-index}|$  at the causal SNP** (assuming phenotype accuracy):

$$\text{SNP-index (W-bulk)} = 0; \quad \text{SNP-index (M-bulk)} = 1$$

$$|\Delta\text{SNP-index}| = |1 - 0| = 1$$

**Expected  $|\Delta\text{SNP-index}|$  at a perfectly linked SNP** (assuming phenotype accuracy):

1) Coupling phase

$$\text{SNP-index (W-bulk)} = 0; \quad \text{SNP-index (M-bulk)} = 1$$

$$|\Delta\text{SNP-index}| = |1 - 0| = 1$$

2) Repulsion phase

$$\text{SNP-index (W-bulk)} = 1; \quad \text{SNP-index (M-bulk)} = 0$$

$$|\Delta\text{SNP-index}| = |0 - 1| = 1$$

**Expected  $|\Delta\text{SNP-index}|$  at a non-causal, unlinked SNP** (assuming phenotype accuracy):

$$\text{SNP-index (W-bulk)} = \text{SNP-index (M-bulk)} = 0.5$$



$$|\Delta\text{SNP-index}| = |0.5 - 0.5| = 0$$

**Probability of a non-causal, unlinked SNP with  $|\Delta\text{SNP-index}| \geq 0.8$**

$$= [\text{Probability of } \Delta\text{SNP-index} \geq 0.8] + [\text{Probability of } \Delta\text{SNP-index} \leq -0.8]$$

For example, when the average sequencing depth in each bulk = 10,

1) Probability of  $\Delta\text{SNP-index} \geq 0.8$

There are 6 cases (3 + 2 + 1) when  $\Delta\text{SNP-index} \geq 0.8$

| Case | No. of reads mapping to the mutant allele |        | SNP-index |        | $\Delta\text{SNP-index}$ |
|------|-------------------------------------------|--------|-----------|--------|--------------------------|
|      | W-bulk                                    | M-bulk | W-bulk    | M-bulk |                          |
| 1    | 0                                         | 10     | 0         | 1      | 1                        |
| 2    | 1                                         | 10     | 0.1       | 1      | 0.9                      |
| 3    | 2                                         | 10     | 0.2       | 1      | 0.8                      |
| 4    | 0                                         | 9      | 0         | 0.9    | 0.9                      |
| 5    | 1                                         | 9      | 0.1       | 0.9    | 0.8                      |
| 6    | 0                                         | 8      | 0         | 0.8    | 0.8                      |

$$\text{Probability of } \Delta\text{SNP-index} \geq 0.8 = (3 + 2 + 1) * (0.5^{10}) * (0.5^{10})$$

2) Probability of  $\Delta\text{SNP-index} \leq -0.8$

There are 6 cases (3 + 2 + 1) when  $\Delta\text{SNP-index} \leq -0.8$

| Case | No. of reads mapping to the mutant allele |        | SNP-index |        | $\Delta\text{SNP-index}$ |
|------|-------------------------------------------|--------|-----------|--------|--------------------------|
|      | W-bulk                                    | M-bulk | W-bulk    | M-bulk |                          |
| 1    | 10                                        | 0      | 1         | 0      | -1                       |
| 2    | 10                                        | 1      | 1         | 0.1    | -0.9                     |
| 3    | 10                                        | 2      | 1         | 0.2    | -0.8                     |
| 4    | 9                                         | 0      | 0.9       | 0      | -0.9                     |
| 5    | 9                                         | 1      | 0.9       | 0.1    | -0.8                     |
| 6    | 8                                         | 0      | 0.8       | 0      | -0.8                     |

$$\text{Probability of } \Delta\text{SNP-index} \leq -0.8 = (3 + 2 + 1) * (0.5^{10}) * (0.5^{10})$$

3) Probability of  $|\Delta\text{SNP-index}| \geq 0.8$

$$= 2 * (3 + 2 + 1) * (0.5^{10}) * (0.5^{10})$$

To generalize, when the average coverage in each bulk = n

1) Probability of  $\Delta\text{SNP-index} \geq 0.8$

There are  $(\text{Int}(0.2n) + 1) * (\text{Int}(0.2n) + 2) / 2$  cases when  $\Delta\text{SNP-index} \geq 0.8$ .

(Int indicates integer value)

Probability of  $\Delta\text{SNP-index} \geq 0.8$

$$= (\text{Int}(0.2n) + 1) * (\text{Int}(0.2n) + 2) / 2 * (0.5^n) * (0.5^n)$$

2) Similarly, probability of  $\Delta\text{SNP-index} \leq -0.8$

$$= (\text{Int}(0.2n) + 1) * (\text{Int}(0.2n) + 2) / 2 * (0.5^n) * (0.5^n)$$

3) Probability of  $|\Delta\text{SNP-index}| \geq 0.8$

$$= 2 * (\text{Int}(0.2n) + 1) * (\text{Int}(0.2n) + 2) / 2 * (0.5^n) * (0.5^n)$$

$$= (\text{Int}(0.2n) + 1) * (\text{Int}(0.2n) + 2) * 0.5^{2n}$$

Based on this equation, probability of  $|\Delta\text{SNP-index}| \geq 0.8$  at a non-causal, unlinked SNP at different coverage is as follows:

| Coverage | 5 | 10 | 20 | 40 | 80 |
|----------|---|----|----|----|----|
|----------|---|----|----|----|----|

---

|             |        |            |            |            |            |
|-------------|--------|------------|------------|------------|------------|
| Probability | 0.0059 | 1.1444E-05 | 2.7285E-11 | 7.4446E-23 | 2.0937E-46 |
|-------------|--------|------------|------------|------------|------------|

---

The actual number of estimated false positives with the threshold of  $|\Delta\text{SNP-index}| \geq 0.8$  (Fig. 5b) is higher than the calculated probability above. This is because the capture efficiency is highly variable and there are many low-depth regions even under high ( $\sim 40\times$ ) average coverage.

Therefore, as suggested in the discussion section of the manuscript, we recommend targeting higher coverage ( $\sim 80\times$ ) when conducting mapping-by-exome-sequencing experiments compared to performing mapping-by-whole-genome sequencing ( $10\text{-}40\times$ ).
